# Supplementary material
Source: publisher figshare collection journal article supplement (https://geolsoc.figshare.com/ndownloader/files/5422850)
Supplement: Supplementary file 1 [file 5422850]

Table 3e Major oxide, trace element and Sr-Nd-Pb compositions of the Tudun complex
Sample no.	TD09-01	TD09-03	TD09-08	TD09-09	TD09-13	TD09-15		TD09-04	TD09-05	TD09-07	TD09-11	TD09-14	TD09-19	TD09-21	TD09-22	TD09-24
Rock type	Hornblende olivine gabbro							Hornblende gabbro
Oxides (wt%)
SiO2	45.5	44.3	47.1	44.9	46.5	46.4		48.6	46.8	48.9	49.1	48.3	50.0	50.4	52.0	51.0
TiO2	0.25	0.80	0.70	0.40	0.82	0.73		0.50	0.54	0.31	0.42	0.82	0.80	0.96	1.05	1.20
Al2O3	14.5	13.4	11.7	12.1	14.6	13.9		20.6	16.9	20.7	19.1	16.9	18.9	16.7	18.3	15.1
(Fe2O3)T	7.59	7.46	11.00	11.66	8.94	9.18		5.30	5.36	4.38	4.90	7.24	6.09	8.66	7.10	8.70
MnO	0.13	0.12	0.18	0.14	0.14	0.14		0.09	0.10	0.08	0.09	0.12	0.10	0.15	0.12	0.15
MgO	12.3	11.1	14.8	14.8	13.0	13.7		6.42	6.80	6.43	7.06	9.03	6.46	7.68	5.52	8.11
CaO	8.36	8.41	6.74	7.22	7.42	7.56		11.34	7.42	9.61	11.5	9.81	9.73	8.68	9.04	8.51
Na2O	3.35	2.24	1.87	2.30	2.17	1.87		2.96	5.49	3.35	3.00	2.15	3.27	2.91	3.29	2.79
K2O	0.09	0.02	0.12	0.13	0.47	0.45		0.34	0.08	0.93	0.54	0.94	0.74	1.08	0.82	1.07
P2O5	0.05	0.07	0.07	0.05	0.11	0.11		0.05	0.06	0.06	0.07	0.09	0.15	0.14	0.16	0.35
S	n.d.	n.d.	0.07	1.48	n.d.	n.d.		n.d.	n.d.	n.d.	n.d.	n.d.	n.d.	n.d.	n.d.	n.d.
LOI	7.59	11.80	5.33	4.87	4.04	3.96		3.14	9.39	4.72	2.69	3.14	2.80	2.36	2.38	2.31
Total	99.7	99.7	99.7	98.5	98.2	98.1		99.4	98.9	99.5	98.3	98.5	99.0	99.8	99.8	99.4
Trace elements (ppm)
Sc	24.1	11.5	26.8	19.0	18.0	17.5		25.1	23.4	20.1	25.3	24.4	22.3	22.1	22.8	29.1
Cr	731	589	610	690	538	772		116	116	239	347	616	211	93.4	62.1	252
Co	45.1	29.6	60.0	130	61.9	65.6		36.4	26.8	28.2	28.0	41.7	32.8	49.6	31.2	41.2
Ni	177	140	270	2270	288	287		60	93	205	84	140	62	83	42	104
Cu	42.7	56.7	110	4020	97.0	84.5		55.5	23.3	129	81.9	58.7	72.2	100	40.6	42.5
Rb	0.845	0.154	0.713	0.921	9.00	8.62		6.58	0.844	14.9	9.61	21.5	18.4	24.0	19.3	25.1
Sr	305	193	126	178	296	271		659	343	598	578	442	507	416	483	450
Y	7.51	12.4	13.4	9.65	16.3	14.8		10.9	11.6	8.34	11.1	17.0	17.8	21.9	23.5	26.1
Zr	30.0	14.6	41.9	34.4	77.2	64.5		37.7	49.3	36.1	45.1	63.2	86.5	65.1	107	144
Nb	0.742	1.75	1.50	1.15	2.34	2.54		1.17	1.53	1.02	1.14	2.12	2.73	3.72	3.49	7.97
Ba	44.8	19.8	31.1	33.0	130	118		108.0	48.9	278	151	179	168	306	187	291
La	2.71	4.32	3.63	3.14	5.95	5.70		3.96	3.93	3.97	4.92	5.25	8.00	9.14	9.97	14.3
Ce	6.30	10.6	9.26	7.21	14.0	13.9		8.93	9.13	8.52	10.4	12.9	17.6	22.2	23.1	33.3
Pr	0.873	1.69	1.47	1.01	2.04	2.01		1.25	1.33	1.14	1.39	1.88	2.47	3.24	3.27	4.80
Nd	4.06	8.17	6.93	5.00	9.71	8.95		6.03	6.16	5.05	6.53	9.09	10.9	15.1	14.9	21.1
Sm	1.11	2.26	1.85	1.34	2.56	2.32		1.68	1.64	1.28	1.59	2.39	2.81	3.71	3.91	5.23
Eu	0.484	1.249	0.709	0.569	1.08	0.962		0.784	0.723	0.844	0.823	1.05	1.11	1.34	1.37	1.76
Gd	1.28	2.74	2.32	1.68	2.79	2.54		2.08	1.97	1.56	2.09	3.02	3.17	4.03	4.15	5.42
Tb	0.234	0.441	0.355	0.254	0.485	0.428		0.312	0.354	0.237	0.314	0.510	0.495	0.661	0.711	0.862
Dy	1.40	2.50	2.29	1.65	2.78	2.54		1.86	2.03	1.50	1.81	3.07	3.06	3.79	4.15	4.76
Ho	0.304	0.548	0.506	0.347	0.665	0.547		0.422	0.472	0.330	0.406	0.671	0.667	0.875	0.916	1.030
Er	0.829	1.40	1.38	0.933	1.69	1.54		1.13	1.29	0.847	1.11	1.73	1.84	2.33	2.44	2.74
Tm	0.121	0.186	0.203	0.156	0.260	0.216		0.157	0.170	0.117	0.145	0.251	0.244	0.325	0.344	0.386
Yb	0.754	1.16	1.25	0.863	1.50	1.42		0.983	1.13	0.777	1.03	1.62	1.68	2.10	2.21	2.46
Lu	0.100	0.160	0.203	0.130	0.230	0.207		0.124	0.161	0.121	0.144	0.223	0.243	0.312	0.316	0.359
Hf	0.853	0.539	1.22	0.883	1.91	1.86		1.00	1.26	0.844	1.11	1.60	2.17	2.07	2.84	3.45
Ta	0.063	0.141	0.116	0.419	0.182	0.185		0.100	0.123	0.075	0.100	0.161	0.200	0.257	0.265	0.528
Th	0.540	0.341	0.616	0.595	1.37	0.725		0.707	0.908	0.957	0.816	0.797	1.78	1.50	2.01	1.75
U	0.313	0.179	0.234	0.209	0.531	0.253		0.254	0.209	0.335	0.282	0.303	0.645	0.572	0.709	0.694
Pb	1.01	1.90	0.762	8.95	4.13	4.33		3.51	3.63	5.31	6.62	3.07	8.87	4.95	4.98	4.63
Isotopes
87Rb/86Sr	0.0080	0.0023	0.0164	0.0150		0.0920		0.0289	0.0071	0.0721	0.0481	0.1407	0.1049	0.1668	0.1156	0.1613
87Sr/86Sr	0.703577	0.703772	0.703653	0.703581		0.703768		0.703592	0.703506	0.703799	0.703627	0.703942	0.703774	0.704181	0.703907	0.704094
(87Sr/86Sr)ia	0.703545	0.703763	0.703588	0.703521		0.703402		0.703477	0.703478	0.703512	0.703435	0.703382	0.703356	0.703516	0.703447	0.703451
147Sm/144Nd	0.1652	0.1671	0.1613	0.1619		0.1566		0.1683	0.1609	0.1531	0.1471	0.1589	0.1558	0.1484	0.1585	0.1498
143Nd/144Nd	0.512928	0.512912	0.512886	0.512879		0.512823		0.512863	0.512872	0.512888	0.512867	0.512890	0.512918	0.512865	0.512877	0.512859
(143Nd/144Nd)ia	0.512625	0.512606	0.512590	0.512582		0.512536		0.512554	0.512577	0.512607	0.512597	0.512599	0.512633	0.512593	0.512586	0.512585
?Nd (280 Ma)	6.79	6.41	6.11	5.949		5.05		5.41	5.85	6.44	6.24	6.27	6.93	6.16	6.03	5.99
208Pb/204Pb	38.692	38.614	38.578	38.028		37.814		38.613	38.128	38.257	37.783	38.018	37.701	37.855	38.220	38.219
207Pb/204Pb	15.626	15.631	15.574	15.537		15.484		15.636	15.518	15.558	15.485	15.511	15.465	15.500	15.532	15.534
206Pb/204Pb	18.591	18.364	18.675	18.146		18.104		18.374	18.365	18.085	18.086	18.266	18.064	18.265	18.469	18.343
(206Pb/204Pb)ia	17.619	18.067	17.708	18.072		17.920		18.146	18.184	17.886	17.952	17.955	17.835	17.901	18.021	17.872
(207Pb/204Pb)ia	15.576	15.616	15.524	15.533		15.474		15.624	15.509	15.548	15.478	15.495	15.453	15.481	15.509	15.510
(208Pb/204Pb)ia	38.161	38.435	37.772	37.962		37.647		38.413	37.879	38.077	37.660	37.759	37.501	37.553	37.818	37.843
a Initial Sr, Nd, and Pb isotopic ratios at T=280 Ma, calculated using single-stage model
